# Supplementary material for: An illustrated key to Neotropical species of the genus Meteorus Haliday (Hymenoptera, Braconidae, Euphorinae)
Source: Zookeys. 2015 Mar 23;(489):33–94. doi: 10.3897/zookeys.489.9258 (PMC4395838; doi:10.3897/zookeys.489.9258)
Supplement: Supplementary material 1 — Revised material [file zookeys-489-033-s001.xlsx]

## Sheet: Sheet1
Species	Sex	point mounted or alcohol	country (uppercase)	Province	coordinates	Locality	Elevation	collected	pupated	emergence	year	collector	trapping method	Deposited	rearing code	host			host feeding on
M. noctuivorus (h)	f	p	ECUADOR	Napo	S 00° 35.9' W 77° 53.4'	Yanayacu Biological Station, yy road	2163	22.ix	13.x	3.xi	2010		reared	UWIM	51987	Noctuidae		green bombycid type	Urticaceae	Boehmeria bullata
M. noctuivorus	m	p	ECUADOR	Napo	S 00° 35.9' W 77° 53.4'	Yanayacu Biological Station	2163	05.ix	29.ix	26.x	2010		reared	UWIM	51587	Noctuidae		green bombycid type	Urticaceae	Boehmeria bullata
M. orion (h)	f	p	ECUADOR	Napo	S 00° 35.9' W 77° 53.4'	Yanayacu Biological Station, San Isidro forest	2163	17.vii	21.vii	07.viii	2009		reared	UWIM	40067	Noctuidae			Poaceae	Chusquea scandens	suro
M. eurysaccavorus	f	p	BOLIVIA			La Paz, Patacayama Research Station	?	ii-iii			1995		reared	UWIM		Gelechidae	Eurysacca melanocarpa
M. eurysaccavorus	f	p	BOLIVIA			La Paz, Patacayama Research Station	?	ii-iii			1995		reared	UWIM		Gelechidae	Eurysacca melanocarpa
M. eurysaccavorus	f	p	BOLIVIA			La Paz, Patacayama Research Station	?	ii-iii			1995		reared	UWIM		Gelechidae	Eurysacca melanocarpa
M. eurysaccavorus	f	p	BOLIVIA			La Paz, Patacayama Research Station	?	ii-iii			1995		reared	UWIM		Gelechidae	Eurysacca melanocarpa
M. eurysaccavorus	m	p	BOLIVIA			La Paz, Patacayama Research Station	?	ii-iii			1995		reared	UWIM		Gelechidae	Eurysacca melanocarpa
M. eurysaccavorus	m	p	BOLIVIA			La Paz, Patacayama Research Station	?	ii-iii			1995		reared	UWIM		Gelechidae	Eurysacca melanocarpa
M. fallacavus (h)	f	p	COSTA RICA	Puntarenas		San Vito, Estac. Biol. Las Alturas	1500	xii			1991	P. Hanson		UWIM
M. fallacavus	f	p	COSTA RICA	Puntarenas		San Vito, Estac. Biol. Las Alturas	1500	i			1992	P. Hanson		UWIM
M. fallacavus	f	p	COSTA RICA	Cartago		4km NE Canõn Genesis ii	2350	ix			1996	P. Hanson		UWIM
M. carolae (h)	f	p	COSTA RICA	Cartago		Dulce Nombre,Viveiro Linda Vista	1400	vi-viii			1993	P. Hanson		UWIM
M. carolae	f	p	COSTA RICA	Cartago		4km NE Canõn Genesis ii	2350	iv-v			1996	P. Hanson		UWIM
M. carolae	f	p	COSTA RICA	Cartago		4km NE Canõn Genesis ii	2350	v			1995	P. Hanson		UWIM
M. carolae	f	p	COSTA RICA	San Jose		26km N San Isidro just S of Division	2100	vi-viii			1992	P. Hanson	Malaise	UWIM
M. carolae	f	p	COSTA RICA	San Jose		Cerro de la Muerte, 26km N San isidro	2100	ii-v			1992	P. Hanson		UWIM
M. carolae	f	p	COSTA RICA	Puntarenas		San Vito, Estac. Biol. Las Alturas	1500	ii			1992	P. Hanson		UWIM
M. carolae	f	p	COSTA RICA	San Jose		26km N San Isidro just S of Division	2100	ii-iv			1993	P. Hanson		UWIM
M. carolae	f	p	COSTA RICA	San Jose		26km N San Isidro just S of Division	2100	vi-viii			1992	P. Hanson		UWIM
M. carolae	f	p	COSTA RICA	Cartago		Dulce Nombre,Viveiro Linda Vista	1300	viii-x			1993	P. Hanson		UWIM
M. carolae	f	p	COSTA RICA	San Jose		26km N San Isidro just S of Division	2100	iv-v			1993	P. Hanson	Malaise	UWIM
M. carolae	f	p	COSTA RICA	San Jose		26km N San Isidro just S of Division	2100	ii-iv			1993	P. Hanson		UWIM
M. carolae	f	p	COSTA RICA	Cartago		Dulce Nombre,Viveiro Linda Vista	1300	viii-x			1993	P. Hanson		UWIM
M. carolae	f	p	COSTA RICA	San Jose		26km N San Isidro just S of Division	2100	ii-iv			1993	P. Hanson	Malaise	UWIM
M. carolae	f	p	COSTA RICA	Puntarenas		San Vito, Estac. Biol. Las Alturas	1500	ii			1992	P. Hanson		UWIM
M. carolae	f	p	COSTA RICA	San Jose		26km N San Isidro just S of Division	2100	iv-v			1993	P. Hanson	Malaise	UWIM
M. carolae	f	p	COSTA RICA	San Jose		26km N San Isidro just S of Division	2100	vi-viii			1992	P. Hanson	Malaise	UWIM
M. carolae	f	p	COSTA RICA	San Jose		Cerro de la Muerte, 26km N San isidro	2100	ii-v			1992	P. Hanson		UWIM
M. carolae	f	p	COSTA RICA	San Jose		26km N San Isidro just S of Division	2100	iv-v			1993	P. Hanson	Malaise	UWIM
M. carolae	f	p	COSTA RICA	San Jose		Zurqui de Moravia	1600	v			1992	P. Hanson		UWIM
M. carolae	f	p	COSTA RICA	Puntarenas		San Vito, Estac. Biol. Las Alturas	1500	iii			1992	P. Hanson		UWIM
M. carolae	f	p	COSTA RICA	San Jose		26km N San Isidro just S of Division	2100	vi-viii			1992	P. Hanson	Malaise	UWIM
M. carolae	f	p	COSTA RICA	Puntarenas		San Vito, Estac. Biol. Las Alturas	1700	ii-iv			1993	P. Hanson		UWIM
M. carolae	f	p	COSTA RICA	San Jose		Cerro de la Muerte, 26km N San isidro	2100	ii-v			1991	P. Hanson		UWIM
M. carolae	f	p	COSTA RICA	San Jose		Zurqui de Moravia	1600	vi			1990	P. Hanson		UWIM
M. carolae	f	p	COSTA RICA	Cartago		La Cangreja	1950	xii			1991	P. Hanson		UWIM
M. carolae	f	p	COSTA RICA	Cartago		Dulce Nombre,Viveiro Linda Vista	1300	viii-x			1993	P. Hanson		UWIM
M. carolae	f	p	COSTA RICA	San Jose		Zurqui de Moravia	1600	iii			1992	P. Hanson		UWIM
M. carolae	f	p	COSTA RICA	San Jose		26km N San Isidro just S of Division	2100	ii-iv			1993	P. Hanson	Malaise	UWIM
M. carolae	f	p	COSTA RICA	Puntarenas		San Vito, Estac. Biol. Las Alturas	1500	ii			1992	P. Hanson		UWIM
M. carolae	f	p	COSTA RICA	San Jose		Zurqui de Moravia	1600	iii			1992	P. Hanson		UWIM
M. carolae	m	p	COSTA RICA	Guanacaste		Tierras Morenas	700	iii			1993	G. Rodriguez		UWIM
M. carolae	m	p	COSTA RICA	Cartago		Dulce Nombre,Viveiro Linda Vista	1300	viii-x			1993	P. Hanson		UWIM
M. carolae	m	p	COSTA RICA	San Jose		Zurqui de Moravia	1600	vii			1991	P. Hanson		UWIM
M. carolae	m	p	COSTA RICA	Cartago		La Cangreja	1950	xii			1991	P. Hanson		UWIM
M. carolae	m	p	COSTA RICA	Cartago		Dulce Nombre,Viveiro Linda Vista	1300	viii-x			1993	P. Hanson		UWIM
M. carolae	m	p	COSTA RICA	Cartago		4km NE Canõn Genesis ii	2350	vii			1995	P. Hanson		UWIM
M. carolae	m	p	COSTA RICA	San Jose		Zurqui de Moravia	1600	vi			1990	P. Hanson		UWIM
M. carolae	m	p	COSTA RICA	Puntarenas		San Vito, Estac. Biol. Las Alturas	1500	iii			1992	P. Hanson		UWIM
M. carolae	m	p	COSTA RICA	San Jose		Cerro de la Muerte, 26km N San isidro	2100	ii-v			1992	P. Hanson		UWIM
M. carolae	m	p	COSTA RICA	Cartago		La Cangreja	1950	ix-xii			1992	P. Hanson		UWIM
M. carolae	m	p	COSTA RICA	San Jose		26km N San Isidro just S of Division	2100	xi-i			1992-1993	P. Hanson	Malaise	UWIM
M. carolae	m	p	COSTA RICA	Cartago		Dulce Nombre,Viveiro Linda Vista	1300	viii-x			1993	P. Hanson		UWIM
M. carolae	m	p	COSTA RICA	San Jose		Zurqui de Moravia	1600	iv			1992	P. Hanson		UWIM
M. carolae	m	p	COSTA RICA	Cartago		Dulce Nombre,Viveiro Linda Vista	1400	vi-viii			1993	P. Hanson		UWIM
M. carolae	m	p	COSTA RICA	Cartago		Dulce Nombre,Viveiro Linda Vista	1400	vi-viii			1993	P. Hanson		UWIM
M. carolae	m	p	COSTA RICA	Cartago		Dulce Nombre,Viveiro Linda Vista	1300	viii-x			1993	P. Hanson		UWIM
M. haimowitzi (h)	f	p	COSTA RICA	Heredia		Vara Blanca	2000	27.iv			2002	Kenji Nishida	reared from cocoon	UWIM
M. albistigma (h)	f	p	COSTA RICA	Alajuela		Chiles de Aquas, Zarcas Café	300	xi			1989	R. Cespedes		UWIM
M. microcavus (h)	f	p	COSTA RICA	Cartago		Cerro de la Muerte, Villa Mills	3000	xi-xii			1989	P. Hanson		UWIM
M. martinezi (h)	f	p	COSTA RICA	Heredia		Vara Blanca, Finca Georgina	2100	iii-iv			1990	P. Hanson		UWIM
M. magnoculus (h)	f	p	COSTA RICA	San Jose		San Pedro, Sabanilla	?	xi			1997	X. Miranda	reared	UWIM		Pyralid		pyralid leaf folder		Ipomoea
M. magnoculus	f	p	COSTA RICA	San Jose		San Pedro, Sabanilla	?	xi			1997	X. Miranda	reared	UWIM		Pyralid		pyralid leaf folder		Ipomoea
M. magnoculus	m	p	COSTA RICA	San Jose		San Pedro, Sabanilla	?	xi			1997	X. Miranda	reared	UWIM		Pyralid		pyralid leaf folder		Ipomoea
M. jerodi	17f; 1m; 1?	p	ECUADOR	Napo	S 00° 43' 52.5'' W 77° 46' 25.3''	Narupa	1186	3.iv	15.iv	29.v	2013		reared	UWIM	73611	Noctuidae			Asteraceae
M. flavistigma (h)	f	p	COSTA RICA	San Jose		Cerro de la Muerte, 19km S, 3 W. Empalme	2600	xii			1992	P. Hanson		UWIM
M. flavistigma	2f ;1m ;1?	p	COSTA RICA	Heredia		P.N. Braulio Carrillo, Est. Barva	2500	v			1990	A. Fernandez		UWIM
M. flavistigma	m	p	COSTA RICA	Heredia		P.N. Braulio Carrillo, Est. Barva	2500	vi			1990	B. Apu & G. varela		UWIM
M. flavistigma	m	p	COSTA RICA	Puntarenas		San Vito, Estac. Biol. Las Alturas	1500	ii			1992	P. Hanson		UWIM
M. kraussi	f	p	COSTA RICA	San Jose		Zurqui de Moravia	1600	viii			1995	P. Hanson		UWIM
M. kraussi	f	p	COSTA RICA	Guanacaste		Est. Pitilla, 9km S de Santa Cecilia	700	viii-ix			1996	P. Rios & C. Moraga		UWIM
M. kraussi	f	p	COSTA RICA	Puntarenas		San Vito, Estac. Biol. Las Alturas	1500	vi			1992	P. Hanson		UWIM
M. kraussi	f	p	COSTA RICA	Alajuela		5km W San Ramon	1200	iv			1997	O. Castro & P. Hanson		UWIM
M. guineverae	f	p	COSTA RICA	Cartago		La Cangreja	1950	xi			1991	P. Hanson		UWIM
M. guineverae	f	p	COSTA RICA	Heredia		Vara Blanca, Finca Georgina	2100	i-ii			1990	P. Hanson		UWIM
M. guineverae	f	p	COSTA RICA	San Jose		Zurqui de Moravia	1600	ii			1996	P. Hanson	Malaise	UWIM
M. andreae	f	p	COSTA RICA	Guanacaste		Volcan Cacao, Cerro Pedrgal	1000	ii-iv			1989	I. Gauld & D. Janzen		UWIM
M. andreae	f	p	COSTA RICA	San Jose		Cerro de la Muerte, 26km N San isidro	2100	ii-v			1991	P. Hanson		UWIM
M. andreae	f	p	COSTA RICA	Puntarenas		San Vito, Estac. Biol. Las Alturas	1500	xii			1991	P. Hanson		UWIM
M. andreae	f	p	COSTA RICA	Cartago		La Cangreja	1950	vii			1991	P. Hanson	Malaise	UWIM
M. andreae	f	p	COSTA RICA	San Jose		Cerro de la Muerte	2100	ii-v			1992	P. Hanson	Malaise	UWIM
M. andreae	f	p	COSTA RICA	Cartago		Cerro de la Muerte	3000	xii-i			1988-1989	P. Hanson	Malaise	UWIM
M. andreae	m	p	COSTA RICA	San Jose		San Isidro	2100	ii-iv			1993	P. Hanson	Malaise	UWIM
M. andreae	f	p	COSTA RICA	Alajuela		San Ramon	1200	vii
M. quimbayensis	f	p	ECUADOR	Napo	S 00° 35.9' W 77° 53.4'	Yanayacu Biological Station, J. Simbaña Macucoloma trail	2163	1-10.v			2009	S.R. Shaw	Malaise	UWIM
M. quimbayensis	f	p	ECUADOR	Napo	S 00° 35.9' W 77° 53.4'	Yanayacu Biological Station, J. Simbaña Macucoloma trail	2163	1-8.ix			2007	S.R. Shaw	Malaise	UWIM
M. farallonesis	2f	p	COSTA RICA	Puntarenas		Zona protectora Las tablas, 1km NE de Sitio Portones Camino a Tablas	1530	30.viii-5.ix			1995	M. Chinchilla	Malaise	UWIM
M. farallonesis	f	p	COSTA RICA	Puntarenas		San Vito, Estac. Biol. Las Alturas	1500	ii			1992	P. Hanson		UWIM
M. papiliovorus	f	p	ECUADOR	Napo	S 00° 43' 52.5'' W 77° 46' 25.3''	Narupa, sendero Alucus	1186	14.ix	2.x	7.x	2013		reared	UWIM	80190	Papilionidae		popo de pajaro	Rutaceae	Citrus sp	limon
M. papiliovorus	f	p	ECUADOR	Napo	S 00° 43' 52.5'' W 77° 46' 25.3''	Narupa, sendero Alucus	1186	14.ix	2.x	9.x	2013		reared	UWIM	80191	Papilionidae		popo de pajaro	Rutaceae	Citrus sp	limon
M. papiliovorus	f	p	ECUADOR	Napo	S 00° 43' 52.5'' W 77° 46' 25.3''	Narupa, sendero Alucus	1186	14.ix	2.x	7.x	2013		reared	UWIM	80192	Papilionidae		popo de pajaro	Rutaceae	Citrus sp	limon
M. papiliovorus	f	p	ECUADOR	Napo	S 00° 43' 52.5'' W 77° 46' 25.3''	Narupa, sendero Alucus	1186	14.ix	2.x	7.x	2013		reared	UWIM	80193	Papilionidae		popo de pajaro	Rutaceae	Citrus sp	limon
M. papiliovorus	f	p	ECUADOR	Napo	S 00° 43' 52.5'' W 77° 46' 25.3''	Narupa, sendero Alucus	1186	14.ix	2.x	7.x	2013		reared	UWIM	80194	Papilionidae		popo de pajaro	Rutaceae	Citrus sp	limon
M. papiliovorus	f	p	ECUADOR	Napo	S 00° 43' 52.5'' W 77° 46' 25.3''	Narupa, sendero Alucus	1186	14.ix	2.x	9.x	2013		reared	UWIM	80195	Papilionidae		popo de pajaro	Rutaceae	Citrus sp	limon
M. papiliovorus	f	p	ECUADOR	Napo	S 00° 43' 52.5'' W 77° 46' 25.3''	Narupa, sendero Alucus	1186	14.ix	2.x	7.x	2013		reared	UWIM	80196	Papilionidae		popo de pajaro	Rutaceae	Citrus sp	limon
M. papiliovorus	f	p	ECUADOR	Napo	S 00° 43' 52.5'' W 77° 46' 25.3''	Narupa, sendero Alucus	1186	14.ix	2.x	7.x	2013		reared	UWIM	80197	Papilionidae		popo de pajaro	Rutaceae	Citrus sp	limon
M. papiliovorus	f	p	ECUADOR	Napo	S 00° 43' 52.5'' W 77° 46' 25.3''	Narupa, sendero Alucus	1186	14.ix	2.x	7.x	2013		reared	UWIM	80198	Papilionidae		popo de pajaro	Rutaceae	Citrus sp	limon
M. papiliovorus	f	p	ECUADOR	Napo	S 00° 43' 52.5'' W 77° 46' 25.3''	Narupa, sendero Alucus	1186	14.ix	2.x	7.x	2013		reared	UWIM	80199	Papilionidae		popo de pajaro	Rutaceae	Citrus sp	limon
M. papiliovorus	f	p	ECUADOR	Napo	S 00° 43' 52.5'' W 77° 46' 25.3''	Narupa, sendero Alucus	1186	14.ix	2.x	7.x	2013		reared	UWIM	80200	Papilionidae		popo de pajaro	Rutaceae	Citrus sp	limon
M. papiliovorus	f	p	ECUADOR	Napo	S 00° 43' 52.5'' W 77° 46' 25.3''	Narupa, sendero Alucus	1186	14.ix	2.x	14.x	2013		reared	UWIM	80201	Papilionidae		popo de pajaro	Rutaceae	Citrus sp	limon
M. papiliovorus	f	p	ECUADOR	Napo	S 00° 43' 52.5'' W 77° 46' 25.3''	Narupa, sendero Alucus	1186	14.ix	2.x	7.x	2013		reared	UWIM	80202	Papilionidae		popo de pajaro	Rutaceae	Citrus sp	limon
M. papiliovorus	f	p	ECUADOR	Napo	S 00° 43' 52.5'' W 77° 46' 25.3''	Narupa, sendero Alucus	1186	14.ix	2.x	7.x	2013		reared	UWIM	80204	Papilionidae		popo de pajaro	Rutaceae	Citrus sp	limon
M. papiliovorus	f	p	ECUADOR	Napo	S 00° 43' 52.5'' W 77° 46' 25.3''	Narupa, sendero Alucus	1186	14.ix	2.x	7.x	2013		reared	UWIM	80205	Papilionidae		popo de pajaro	Rutaceae	Citrus sp	limon
M. papiliovorus	f	p	ECUADOR	Napo	S 00° 43' 52.5'' W 77° 46' 25.3''	Narupa, sendero Alucus	1186	14.ix	2.x	7.x	2013		reared	UWIM	80206	Papilionidae		popo de pajaro	Rutaceae	Citrus sp	limon
M. papiliovorus	f	p	ECUADOR	Napo	S 00° 43' 52.5'' W 77° 46' 25.3''	Narupa, sendero Alucus	1186	14.ix	2.x	7.x	2013		reared	UWIM	80207	Papilionidae		popo de pajaro	Rutaceae	Citrus sp	limon
M. papiliovorus	f	p	ECUADOR	Napo	S 00° 43' 52.5'' W 77° 46' 25.3''	Narupa, sendero Alucus	1186	14.ix	2.x	7.x	2013		reared	UWIM	80208	Papilionidae		popo de pajaro	Rutaceae	Citrus sp	limon
M. papiliovorus	f	p	ECUADOR	Napo	S 00° 43' 52.5'' W 77° 46' 25.3''	Narupa, sendero Alucus	1186	14.ix	2.x	7.x	2013		reared	UWIM	80209	Papilionidae		popo de pajaro	Rutaceae	Citrus sp	limon
M. papiliovorus	f	p	ECUADOR	Napo	S 00° 43' 52.5'' W 77° 46' 25.3''	Narupa, sendero Alucus	1186	14.ix	2.x	7.x	2013		reared	UWIM	80211	Papilionidae		popo de pajaro	Rutaceae	Citrus sp	limon
M. papiliovorus	f	p	ECUADOR	Napo	S 00° 43' 52.5'' W 77° 46' 25.3''	Narupa, sendero Alucus	1186	14.ix	2.x	7.x	2013		reared	UWIM	80212	Papilionidae		popo de pajaro	Rutaceae	Citrus sp	limon
M. papiliovorus	f	p	ECUADOR	Napo	S 00° 43' 52.5'' W 77° 46' 25.3''	Narupa, sendero Alucus	1186	14.ix	2.x	7.x	2013		reared	UWIM	80213	Papilionidae		popo de pajaro	Rutaceae	Citrus sp	limon
M. papiliovorus	f	p	ECUADOR	Napo	S 00° 43' 52.5'' W 77° 46' 25.3''	Narupa, sendero Alucus	1186	14.ix	2.x	9.x	2013		reared	UWIM	80214	Papilionidae		popo de pajaro	Rutaceae	Citrus sp	limon
M. papiliovorus	f	p	ECUADOR	Napo	S 00° 43' 52.5'' W 77° 46' 25.3''	Narupa, sendero Alucus	1186	14.ix	2.x	7.x	2013		reared	UWIM	80215	Papilionidae		popo de pajaro	Rutaceae	Citrus sp	limon
M. papiliovorus	f	p	ECUADOR	Napo	S 00° 43' 52.5'' W 77° 46' 25.3''	Narupa, sendero Alucus	1186	14.ix	2.x	8.x	2013		reared	UWIM	80216	Papilionidae		popo de pajaro	Rutaceae	Citrus sp	limon
M. papiliovorus	f	p	ECUADOR	Napo	S 00° 43' 52.5'' W 77° 46' 25.3''	Narupa, sendero Alucus	1186	14.ix	2.x	14.x	2013		reared	UWIM	80217	Papilionidae		popo de pajaro	Rutaceae	Citrus sp	limon
M. papiliovorus	f	p	ECUADOR	Napo	S 00° 43' 52.5'' W 77° 46' 25.3''	Narupa, sendero Alucus	1186	14.ix	2.x	7.x	2013		reared	UWIM	80222	Papilionidae		popo de pajaro	Rutaceae	Citrus sp	limon
M. papiliovorus	f	p	ECUADOR	Napo	S 00° 43' 52.5'' W 77° 46' 25.3''	Narupa, sendero Alucus	1186	14.ix	2.x	8.x	2013		reared	UWIM	80224	Papilionidae		popo de pajaro	Rutaceae	Citrus sp	limon
M. papiliovorus	f	p	ECUADOR	Napo	S 00° 43' 52.5'' W 77° 46' 25.3''	Narupa, sendero Alucus	1186	14.ix	2.x	7.x	2013		reared	UWIM	80226	Papilionidae		popo de pajaro	Rutaceae	Citrus sp	limon
M. papiliovorus	f	p	ECUADOR	Napo	S 00° 43' 52.5'' W 77° 46' 25.3''	Narupa, sendero Alucus	1186	14.ix	2.x	7.x	2013		reared	UWIM	80227	Papilionidae		popo de pajaro	Rutaceae	Citrus sp	limon
M. papiliovorus	f	p	ECUADOR	Napo	S 00° 43' 52.5'' W 77° 46' 25.3''	Narupa, sendero Alucus	1186	14.ix	2.x	7.x	2013		reared	UWIM	80228	Papilionidae		popo de pajaro	Rutaceae	Citrus sp	limon
M. papiliovorus	f	p	ECUADOR	Napo	S 00° 43' 52.5'' W 77° 46' 25.3''	Narupa, sendero Alucus	1186	14.ix	2.x	7.x	2013		reared	UWIM	80229	Papilionidae		popo de pajaro	Rutaceae	Citrus sp	limon
M. papiliovorus	f	p	ECUADOR	Napo	S 00° 43' 52.5'' W 77° 46' 25.3''	Narupa, sendero Alucus	1186	14.ix	2.x	7.x	2013		reared	UWIM	80231	Papilionidae		popo de pajaro	Rutaceae	Citrus sp	limon
M. papiliovorus	f	p	ECUADOR	Napo	S 00° 43' 52.5'' W 77° 46' 25.3''	Narupa, sendero Alucus	1186	14.ix	2.x	7.x	2013		reared	UWIM	80232	Papilionidae		popo de pajaro	Rutaceae	Citrus sp	limon
M. papiliovorus	f	p	ECUADOR	Napo	S 00° 43' 52.5'' W 77° 46' 25.3''	Narupa, sendero Alucus	1186	14.ix	2.x	7.x	2013		reared	UWIM	80233	Papilionidae		popo de pajaro	Rutaceae	Citrus sp	limon
M. papiliovorus	f	p	ECUADOR	Napo	S 00° 43' 52.5'' W 77° 46' 25.3''	Narupa, sendero Alucus	1186	14.ix	2.x	7.x	2013		reared	UWIM	80235	Papilionidae		popo de pajaro	Rutaceae	Citrus sp	limon
M. papiliovorus	f	p	ECUADOR	Napo	S 00° 43' 52.5'' W 77° 46' 25.3''	Narupa, sendero Alucus	1186	14.ix	2.x	10.x	2013		reared	UWIM	80236	Papilionidae		popo de pajaro	Rutaceae	Citrus sp	limon
M. papiliovorus	f	p	ECUADOR	Napo	S 00° 43' 52.5'' W 77° 46' 25.3''	Narupa, sendero Alucus	1186	14.ix	2.x	7.x	2013		reared	UWIM	80238	Papilionidae		popo de pajaro	Rutaceae	Citrus sp	limon
M. papiliovorus	f	p	ECUADOR	Napo	S 00° 43' 52.5'' W 77° 46' 25.3''	Narupa, sendero Alucus	1186	14.ix	2.x	9.x	2013		reared	UWIM	80239	Papilionidae		popo de pajaro	Rutaceae	Citrus sp	limon
M. papiliovorus	f	p	ECUADOR	Napo	S 00° 43' 52.5'' W 77° 46' 25.3''	Narupa, sendero Alucus	1186	14.ix	2.x	7.x	2013		reared	UWIM	80240	Papilionidae		popo de pajaro	Rutaceae	Citrus sp	limon
M. papiliovorus	f	p	ECUADOR	Napo	S 00° 43' 52.5'' W 77° 46' 25.3''	Narupa, sendero Alucus	1186	14.ix	2.x	7.x	2013		reared	UWIM	80241	Papilionidae		popo de pajaro	Rutaceae	Citrus sp	limon
M. papiliovorus	f	p	ECUADOR	Napo	S 00° 43' 52.5'' W 77° 46' 25.3''	Narupa, sendero Alucus	1186	14.ix	2.x	7.x	2013		reared	UWIM	80242	Papilionidae		popo de pajaro	Rutaceae	Citrus sp	limon
M. papiliovorus	f	p	ECUADOR	Napo	S 00° 43' 52.5'' W 77° 46' 25.3''	Narupa, sendero Alucus	1186	14.ix	2.x	9.x	2013		reared	UWIM	80243	Papilionidae		popo de pajaro	Rutaceae	Citrus sp	limon
M. papiliovorus	f	p	ECUADOR	Napo	S 00° 43' 52.5'' W 77° 46' 25.3''	Narupa, sendero Alucus	1186	14.ix	2.x	7.x	2013		reared	UWIM	80244	Papilionidae		popo de pajaro	Rutaceae	Citrus sp	limon
M. papiliovorus	f	p	ECUADOR	Napo	S 00° 43' 52.5'' W 77° 46' 25.3''	Narupa, sendero Alucus	1186	14.ix	2.x	10.x	2013		reared	UWIM	80246	Papilionidae		popo de pajaro	Rutaceae	Citrus sp	limon
M. papiliovorus	f	p	ECUADOR	Napo	S 00° 43' 52.5'' W 77° 46' 25.3''	Narupa, sendero Alucus	1186	14.ix	2.x	14.x	2013		reared	UWIM	80247	Papilionidae		popo de pajaro	Rutaceae	Citrus sp	limon
M. papiliovorus	f	p	ECUADOR	Napo	S 00° 43' 52.5'' W 77° 46' 25.3''	Narupa, sendero Alucus	1186	14.ix	2.x	7.x	2013		reared	UWIM	80249	Papilionidae		popo de pajaro	Rutaceae	Citrus sp	limon
M. papiliovorus	f	p	ECUADOR	Napo	S 00° 43' 52.5'' W 77° 46' 25.3''	Narupa, sendero Alucus	1186	14.ix	2.x	7.x	2013		reared	UWIM	80250	Papilionidae		popo de pajaro	Rutaceae	Citrus sp	limon
M. papiliovorus	f	p	ECUADOR	Napo	S 00° 43' 52.5'' W 77° 46' 25.3''	Narupa, sendero Alucus	1186	14.ix	2.x	7.x	2013		reared	UWIM	80251	Papilionidae		popo de pajaro	Rutaceae	Citrus sp	limon
M. papiliovorus	f	p	ECUADOR	Napo	S 00° 43' 52.5'' W 77° 46' 25.3''	Narupa, sendero Alucus	1186	14.ix	2.x	7.x	2013		reared	UWIM	80254	Papilionidae		popo de pajaro	Rutaceae	Citrus sp	limon
M. papiliovorus	f	p	ECUADOR	Napo	S 00° 43' 52.5'' W 77° 46' 25.3''	Narupa, sendero Alucus	1186	14.ix	2.x	7.x	2013		reared	UWIM	80257	Papilionidae		popo de pajaro	Rutaceae	Citrus sp	limon
M. papiliovorus	f	p	ECUADOR	Napo	S 00° 43' 52.5'' W 77° 46' 25.3''	Narupa, sendero Alucus	1186	14.ix	2.x	1.x	2013		reared	UWIM	80261	Papilionidae		popo de pajaro	Rutaceae	Citrus sp	limon
M. papiliovorus	f	p	ECUADOR	Napo	S 00° 43' 52.5'' W 77° 46' 25.3''	Narupa, sendero Alucus	1186	14.ix	2.x	30.ix	2013		reared	UWIM	80262	Papilionidae		popo de pajaro	Rutaceae	Citrus sp	limon
M. papiliovorus	f	p	ECUADOR	Napo	S 00° 43' 52.5'' W 77° 46' 25.3''	Narupa, sendero Alucus	1186	14.ix	2.x	30.ix	2013		reared	UWIM	80263	Papilionidae		popo de pajaro	Rutaceae	Citrus sp	limon
M. papiliovorus	f	p	ECUADOR	Napo	S 00° 43' 52.5'' W 77° 46' 25.3''	Narupa, sendero Alucus	1186	14.ix	2.x	30.ix	2013		reared	UWIM	80264	Papilionidae		popo de pajaro	Rutaceae	Citrus sp	limon
M. papiliovorus	f	p	ECUADOR	Napo	S 00° 43' 52.5'' W 77° 46' 25.3''	Narupa, sendero Alucus	1186	14.ix	2.x	30.ix	2013		reared	UWIM	80265	Papilionidae		popo de pajaro	Rutaceae	Citrus sp	limon
M. papiliovorus	f	p	ECUADOR	Napo	S 00° 43' 52.5'' W 77° 46' 25.3''	Narupa, sendero Alucus	1186	14.ix	2.x	24.ix	2013		reared	UWIM	80266	Papilionidae		popo de pajaro	Rutaceae	Citrus sp	limon
M. papiliovorus	f	p	ECUADOR	Napo	S 00° 43' 52.5'' W 77° 46' 25.3''	Narupa, sendero Alucus	1186	14.ix	2.x	24.ix	2013		reared	UWIM	80267	Papilionidae		popo de pajaro	Rutaceae	Citrus sp	limon
M. papiliovorus	f	p	ECUADOR	Napo	S 00° 43' 52.5'' W 77° 46' 25.3''	Narupa, sendero Alucus	1186	14.ix	2.x	30.ix	2013		reared	UWIM	80268	Papilionidae		popo de pajaro	Rutaceae	Citrus sp	limon
M. papiliovorus	f	p	ECUADOR	Napo	S 00° 43' 52.5'' W 77° 46' 25.3''	Narupa, sendero Alucus	1186	14.ix	2.x	24.ix	2013		reared	UWIM	80271	Papilionidae		popo de pajaro	Rutaceae	Citrus sp	limon
M. papiliovorus	f	p	ECUADOR	Napo	S 00° 43' 52.5'' W 77° 46' 25.3''	Narupa, sendero Alucus	1186	14.ix	2.x	24.ix	2013		reared	UWIM	80272	Papilionidae		popo de pajaro	Rutaceae	Citrus sp	limon
M. papiliovorus	f	p	ECUADOR	Napo	S 00° 43' 52.5'' W 77° 46' 25.3''	Narupa, sendero Alucus	1186	14.ix	2.x	24.ix	2013		reared	UWIM	80273	Papilionidae		popo de pajaro	Rutaceae	Citrus sp	limon
M. papiliovorus	f	p	ECUADOR	Napo	S 00° 43' 52.5'' W 77° 46' 25.3''	Narupa, sendero Alucus	1186	14.ix	2.x	24.ix	2013		reared	UWIM	80274	Papilionidae		popo de pajaro	Rutaceae	Citrus sp	limon
M. papiliovorus	f	p	ECUADOR	Napo	S 00° 43' 52.5'' W 77° 46' 25.3''	Narupa, sendero Alucus	1186	14.ix	2.x	24.ix	2013		reared	UWIM	80275	Papilionidae		popo de pajaro	Rutaceae	Citrus sp	limon
M. papiliovorus	f	p	ECUADOR	Napo	S 00° 43' 52.5'' W 77° 46' 25.3''	Narupa, sendero Alucus	1186	14.ix	2.x	1.x	2013		reared	UWIM	80277	Papilionidae		popo de pajaro	Rutaceae	Citrus sp	limon
M. papiliovorus	f	p	ECUADOR	Napo	S 00° 43' 52.5'' W 77° 46' 25.3''	Narupa, sendero Alucus	1186	14.ix	2.x	24.ix	2013		reared	UWIM	80278	Papilionidae		popo de pajaro	Rutaceae	Citrus sp	limon
M. papiliovorus	f	p	ECUADOR	Napo	S 00° 43' 52.5'' W 77° 46' 25.3''	Narupa, sendero Alucus	1186	14.ix	2.x	24.ix	2013		reared	UWIM	80279	Papilionidae		popo de pajaro	Rutaceae	Citrus sp	limon
M. papiliovorus	f	p	ECUADOR	Napo	S 00° 43' 52.5'' W 77° 46' 25.3''	Narupa, sendero Alucus	1186	14.ix	2.x	24.ix	2013		reared	UWIM	80280	Papilionidae		popo de pajaro	Rutaceae	Citrus sp	limon
M. papiliovorus	f	p	ECUADOR	Napo	S 00° 43' 52.5'' W 77° 46' 25.3''	Narupa, sendero Alucus	1186	14.ix	2.x	27.ix	2013		reared	UWIM	80281	Papilionidae		popo de pajaro	Rutaceae	Citrus sp	limon
M. papiliovorus	f	p	ECUADOR	Napo	S 00° 43' 52.5'' W 77° 46' 25.3''	Narupa, sendero Alucus	1186	14.ix	2.x	24.ix	2013		reared	UWIM	80282	Papilionidae		popo de pajaro	Rutaceae	Citrus sp	limon
M. papiliovorus	f	p	ECUADOR	Napo	S 00° 43' 52.5'' W 77° 46' 25.3''	Narupa, sendero Alucus	1186	14.ix	2.x	8.x	2013		reared	UWIM	80284	Papilionidae		popo de pajaro	Rutaceae	Citrus sp	limon
